# Supplementary material for: Transgenic overexpression of endogenous FLOWERING LOCUS T-like gene MeFT1 produces early flowering in cassava
Source: PubMed Central journal article supplement (PMC6986757; doi:10.1371/journal.pone.0227199), 2020-01-28
Supplement: pone.0227199.s001.pdf [file pone.0227199.s001.pdf]

**S1 Table 1: Primers used for molecular detection and RT-qPCR analysis**

| Primer number | Primer sequence               | Targeted gene  | Purpose             |
|---------------|-------------------------------|----------------|---------------------|
| 1             | CACATGAGCGAAACCCTATAGGAACCC   | p5000 vector   | Molecular detection |
| 2             | GCACTGACGACAACAATGAAAAGA      |                |                     |
| 3             | 5'-TCGGCAATTAGGAAGACA-3'      | <i>MeFT1</i>   | RT-qPCR             |
| 4             | 5'-GTAAACAGCGGCAACGGGC-3'     |                |                     |
| 5             | 5'-GCATAGAGAACGCGACAAGCAGG-3' | <i>MeSOC11</i> | RT-qPCR             |
| 6             | 5'-GGGCAACCTCGGCATCGCAA-3'    |                |                     |
| 7             | 5'-AGGCGCTGGGTTCTGGTT-3'      | <i>MeSOC12</i> | RT-qPCR             |
| 8             | 5'-ATGCAGGAGACAATTGAACG-3'    |                |                     |
| 9             | 5'-TCAGGTGTTCAAGTACGCC-3'     | <i>MeLFY1</i>  | RT-qPCR             |
| 10            | 5'-CTCTCCTCAGTGCATTGG-3'      |                |                     |
| 11            | 5'-GAAGGCAGGAGCAAGCTAC-3'     | <i>MeLFY2</i>  | RT-qPCR             |
| 12            | 5'-ATGCCGTGTCTCCACGCTCCA-3'   |                |                     |
| 13            | 5'-TTGTTGAAGAAAGCCCATGAG-3'   | <i>MeAP11</i>  | RT-qPCR             |
| 14            | 5'-GTAGAGTATTCAAAGAGCTTCC-3'  |                |                     |
| 15            | 5'-CAAGCGGATCGAGAACAAG-3'     | <i>MeAP12</i>  | RT-qPCR             |
| 16            | 5'-TCAAAGCAACCTCAGCATC-3'     |                |                     |
| 17            | 5'-ATGGGGAGAGGTAGAGTTC-3'     | <i>MeAP13</i>  | RT-qPCR             |
| 18            | 5'-CCTCAGCATCGCAAAGCAC-3'     |                |                     |
| 19            | 5'-TCCGCCTTCCAATCTCCTC-3'     | <i>MeFD1</i>   | RT-qPCR             |
| 20            | 5'-ATGGCGAGTGGGAGCGAC-3'      |                |                     |
| 21            | 5'-ACTATGGAAGAGGTCTGG-3'      | <i>MeFD2</i>   | RT-qPCR             |
| 22            | 5'-GTTAGGTTATGATGAGG-3'       |                |                     |
| 23            | 5'-GCGCCAAGAAGTCCACT-3'       | <i>MeFD3</i>   | RT-qPCR             |
| 24            | 5'-CGATGAAGAACCAGAGCACC-3'    |                |                     |
| 25            | 5'-TGCAAGGCTCACACTTTCATC-3'   | <i>MePP2A</i>  | RT-qPCR             |
| 26            | 5'-CTGAGCGTAAAGCAGGAAG-3'     |                |                     |
